# 1 **Linking nitrogen load to the structure and function of wetland soil and** 2 **rhizosphere microbial communities**

3 Eric R Hester<sup>1\*</sup>, Sarah F. Harpenslager<sup>2,3</sup>, Josepha MH van Diggelen<sup>2,4</sup>, Leon L Lamers<sup>2</sup>, Mike SM  
4 Jetten<sup>1</sup>, Claudia Lüke<sup>1</sup>, Sebastian Lucker<sup>1</sup>, Cornelia U Welte<sup>1\*</sup>

5 <sup>1</sup>Department of Microbiology, Radboud University, Nijmegen, The Netherlands

6 <sup>2</sup>Department of Aquatic Ecology and Environmental Biology, Radboud University, Nijmegen, The  
7 Netherlands

8 <sup>3</sup>School of Biological and Chemical Sciences, Queen Mary University, London, United Kingdom

9 <sup>4</sup>B-WARE Research Centre, Nijmegen, The Netherlands

10

## 11 **\*Correspondence:**

12 Eric R Hester

13 e.hester@science.ru.nl

14

15 Cornelia U Welte

16 c.welte@science.ru.nl

17

18 **Keywords:** greenhouse gas, microbial community function, Opitutales, Acidobacteria,  
19 Sphingobacteriales, wetlands, *Juncus acutiflorus*, nitrogen

## 20 **Abstract**

21 Wetland ecosystems are important reservoirs of biodiversity and significantly contribute to emissions  
22 of the greenhouse gases CO<sub>2</sub>, N<sub>2</sub>O and CH<sub>4</sub>. High anthropogenic nitrogen (N) inputs from agriculture  
23 and fossil fuel combustion have been recognized as a severe threat to biodiversity and ecosystem  
24 functioning such as control of greenhouse gas emissions. Therefore it is important to understand how  
25 increased N input into pristine wetlands affects the composition and activity of micro-organisms,  
26 especially in interaction with dominant wetland plants. In a series of incubations analyzed over 90  
27 days, we disentangle the effects of N fertilization on the microbial community in bulk soil and the  
28 rhizosphere of *Juncus acutiflorus*, a common and abundant graminoid wetland plant. We observed an  
29 increase in greenhouse gas emissions when N is increased in incubations with *J. acutiflorus*,  
30 changing the system from a greenhouse gas sink to a source. Using 16S rRNA amplicon sequencing  
31 and metagenomics, we determined that the bacterial orders Opitutales, Subgroup-6 Acidobacteria and  
32 Sphingobacteriales significantly responded to high N availability and we hypothesize that these  
33 groups are contributing to the increased greenhouse gas emissions. These results indicated that  
34 increased N input leads to shifts in microbial activity within the rhizosphere, severely altering N  
35 cycling dynamics. Our study provides a framework for connecting environmental conditions of  
36 wetland bulk and rhizosphere soil to the structure and metabolic output of microbial communities.

37

## Nitrogen impacts on microbial function

### 38 Introduction

39 Wetlands are globally impacted by agricultural industry through the leaching of various nitrogen (N)  
40 forms such as nitrate ( $\text{NO}_3^-$ ), and by increased N deposition as a result of high N emissions from  
41 fossil fuel burning and agriculture (Galloway *et al.*, 2008). Furthermore, due to reduced oxidation  
42 under stagnant, waterlogged conditions, these systems show increased availability of ammonium  
43 ( $\text{NH}_4^+$ ) (Britto and Kronzucker, 2002). The strongly increased anthropogenic N input influences  
44 ecosystem degradation by contributing to biodiversity loss and altering (mostly increasing)  
45 greenhouse gas fluxes such as nitrous oxide ( $\text{N}_2\text{O}$ ), methane ( $\text{CH}_4$ ) and carbon dioxide ( $\text{CO}_2$ )  
46 (Bobbink *et al.*, 1998; Liu and Greaver, 2009; Van den Heuvel *et al.*, 2011; Soons *et al.*, 2016).

47 The abundance, composition and activity of micro-organisms strongly influence the biogeochemical  
48 cycling of wetland nutrients, particularly those resulting in emissions of greenhouse gases (Lamers *et al.*  
49 *et al.*, 2012; Philippot *et al.*, 2009). Specifically,  $\text{N}_2\text{O}$  emission may increase due to lowering of pH  
50 affecting the activity of incomplete denitrifiers (Brenzinger *et al.*, 2015; Van den Heuvel *et al.*, 2011;  
51 Liu and Greaver, 2009).  $\text{CH}_4$  emissions can increase due to competitive inhibition of the key enzyme  
52 of aerobic methanotrophs, methane monooxygenase (MMO), by elevated  $\text{NH}_4^+$ , osmotic stress of  
53 methanotrophs, or through the stimulation of methanogenic archaea (King and Schnell, 1998;  
54 Bodelier and Laanbroek, 2004; Dunfield and Knowles, 1995). Finally, the rate of soil C loss can  
55 increase as a result of N addition through the stimulation of heterotrophic respiration (Bragazza *et al.*,  
56 2006). Although it is well established that microbial processes are important drivers of ecosystem  
57 functions, such as controls on greenhouse gas emissions and nutrient cycling, there is a lack of  
58 understanding of how these functions are linked, both to the environmental conditions and to the  
59 composition of the microbial community (Philippot *et al.*, 2009).

60 Wetland plant roots influence the soil region surrounding the root, known as the rhizosphere, by  
61 altering the availability of oxygen, organic matter, and organic plant exudates (Smith and Delaune,  
62 1984; Abou Seada and Ottow, 1985; Bardgett and van der Putten, 2014). The total area of soil  
63 influenced by roots can be considerable, meaning that this definition of the rhizosphere may extend  
64 to the vast majority of the upper soil layer (Robinson *et al.*, 2003). The rhizosphere is an active,  
65 complex ecosystem where viruses, bacteria, archaea, fungi and protozoa interact with plant roots  
66 (Fierer *et al.*, 2007b). These microorganisms significantly contribute to nutrient cycling and  
67 ecosystem structure by channeling energy into higher trophic levels (reviewed in Curl & Harper  
68 1990; Hinsinger *et al.* 2009).

69 While the rhizosphere has been studied for decades, the effects of eutrophication on the plant-  
70 microbe interactions are of more recent interest. Specifically, it is of interest how N availability  
71 influence plant physiology and ultimately C and N cycling in the rhizosphere. On the global scale,  
72 soil microbial communities differ depending on the regional and local N regime; although, the  
73 diversity of these communities does not seem to vary much (Fierer *et al.*, 2012). Interestingly,  
74 variation in microbial community composition seems to be predictable based on local nutrient  
75 regimes (Leff *et al.*, 2015; Ramirez *et al.*, 2012). Even though these studies demonstrate the link  
76 between nutrient loading and community structure, they do not demonstrate how changes in the  
77 microbial community are functionally relevant to the ecosystem..

78 To build dynamic models of plant-microbe interactions, it is necessary to gain a robust understanding  
79 of the connection between environmental conditions (i.e., N availability) and microbial community  
80 structure and function (i.e., the bulk biological processes resulting in greenhouse gas emissions). In  
81 this study, we aimed at assessing the impact of increased N input into wetland systems on the

## Nitrogen impacts on microbial function

82 rhizosphere microbial community and its functions related to greenhouse gas production. To achieve  
83 this, we used *Juncus acutiflorus* (Sharp-flowered Rush), a very common graminoid plant in European  
84 wetlands that forms a dense vegetation and is known for radial oxygen loss from roots (ROL; Lamers  
85 et al. 2012). Furthermore, it has a high tolerance for increased N inputs (van Diggelen *et al.*, 2016).  
86 In a longitudinal study we determined greenhouse gas emissions increase as a result of N addition in  
87 incubations with *J. acutiflorus*, but not in incubations with only bulk wetland soil, under controlled  
88 stable experimental conditions. Additionally, functional responses were linked to shifts in the  
89 dominant members of the microbial community. We hypothesize that certain key microbial groups  
90 contribute to greenhouse gas emissions, either directly or indirectly through the food web. Our study  
91 takes the first steps toward a predictive understanding of microbial dynamics within the rhizosphere,  
92 linking nutrient load, microbial community structure and function.

## 93 **Materials and Methods**

### 94 **Sample Collection and experimental set up.**

95 Plants and sandy soil were sampled from the Ravenvenen (51.4399 N, 6.1961 E) in Limburg, The  
96 Netherlands (August, 2015) and returned to the Radboud University greenhouse facilities for  
97 conditioning. The Ravenvenen is a protected marshy area consisting of sandy soil, rich in vegetation  
98 with a high prevalence of *Juncus spp.* Plants were removed from soil, rhizomes were cut into eight  
99 2 cm fragments and reconditioned on hydroculture in a nutrient rich medium (as described in  
100 Hoagland & Arnon 1950). After sufficient root development (to approximately 25 cm after 2 weeks),  
101 eight plants and eight bulk soil incubations were randomly assigned to high or low nitrogen  
102 experimental groups (Supplementary table 1; Supplementary figure 1). Soil collected from the field,  
103 was homogenized and sieved to remove any contaminating roots and potted. The reconditioned  
104 plants were transferred to pots with a diameter of 19 cm at the base, 26 cm at the top and a height of  
105 19 cm containing the prepared soil, moved to an indoor water bath set to 15°C (cryostat, NESLAB,  
106 Thermoflex 1400, Breda, The Netherlands) and cultivated with a day/night cycle of 16 hours light  
107 and 8 hours dark (Master Son-T PiaPlus, Philips, Eindhoven, The Netherlands). Pots were kept  
108 waterlogged with a 2 cm water layer on top. A drip-percolation based system ensured a constant  
109 supply of nutrients. The low N input nutrient solution contained 12.5 µM NH<sub>4</sub>NO<sub>3</sub>, corresponding to  
110 an N loading rate of 40 kg N ha<sup>-1</sup> yr<sup>-1</sup>. The high N input solution contained 250 µM NH<sub>4</sub>NO<sub>3</sub>,  
111 corresponding to 800 kg N ha<sup>-1</sup> yr<sup>-1</sup>. These rates fall within N loading of wetlands in agricultural  
112 catchments, thus represent contrasting extremes (Verhoeven et al., 2006).

### 113 **Incubation measurements.**

114 Five representative *J. acutiflorus* specimens were harvested for initial measurements of plant dry  
115 weight, C:N ratios. At the final time point (T<sub>f</sub> = 90 days), all plants were harvested to measure dry  
116 weight and C:N ratios of roots, shoots and rhizomes. Pore water was extracted using 0.15 µm porous  
117 soil moisture samplers (SMS rhizons, Rhizosphere Research Products, Wageningen, The  
118 Netherlands) and measured over the course of the experiment to determine inorganic nutrients as well  
119 as metals using an Autoanalyzer (Autoanalyzer 3, Bran+Luebbe, Germany) and ICP-OES  
120 (iCAP6000, Thermo Scientific, Waltham, MA). To reduce the impact of soil heterogeneity, samples  
121 were extracted in duplicate and mean values were calculated.

### 122 **Greenhouse gas measurements.**

123 To determine greenhouse gas fluxes, a cylindrical transparent collection chamber (7.5 x 30cm) was  
124 used to measure accumulation or depletion of CO<sub>2</sub>, CH<sub>4</sub> and N<sub>2</sub>O in the headspace. CO<sub>2</sub> and CH<sub>4</sub>

## Nitrogen impacts on microbial function

125 fluxes were measured at  $T_m$  (45 days) and  $T_f$  and  $N_2O$  fluxes were measured at  $T_f$ . Fluxes were  
126 measured using a Picarro G2308 NIRS-CRD greenhouse gas analyzer (Picarro Inc., Santa Clara, CA,  
127 USA). Fluxes were determined by fitting a smoothed spline to the time series using the R function  
128 *sm.spline* from the *pspline* package and the average rate of change was calculated (Ramsay *et al.*,  
129 1997).

### 130 Denitrification potential.

131 To measure denitrification potential, two soil slurries were made from each experimental pot by  
132 mixing 50g soil with 100mL milliQ water, divided into control and experimental bottles and made  
133 anoxic by flushing with argon gas. Bottles were pre-incubated overnight at 15°C to allow for residual  
134 unlabeled  $NO_3^-$  to be consumed. A  $^{15}N$ -labeled  $NaNO_3$  solution was added to the experimental  
135 bottles to a final concentration of 500  $\mu M$  and a KCl solution was added to the control bottles to a  
136 final concentration of 500  $\mu M$ . Production of  $N_2O$  and  $N_2$  were measured by taking samples 2, 7 and  
137 22 h after adding substrate on a GC-MS (5975C, Agilent Technologies, Santa Clara, USA).

### 138 DNA extraction, 16S rRNA Amplicon and Metagenomic sequencing.

139 Soil was collected from three time points, one initial soil sample from the site, and  $T_m$  and  $T_f$  samples  
140 from each of the 16 incubations. A single core per pot was taken using a 1x7cm corer. DNA was  
141 extracted using the PowerSoil DNA Isolation Kit (MoBio, Carlsbad, CA, U.S.A.). 16S rRNA genes  
142 were amplified in triplicate reactions using IonTorrent sequencing adapter-barcoded primers 341F  
143 (CCATCTCATCCCTGCGTGTCTCCGACTCAGXXXXXXXXXXGATCCTACGGGNGGCWGCAG)  
144 and 785R  
145 (CCACTACGCCTCCGCTTTCCTCTCTATGGGCAGTCGGTGATGACTACHVGGGTATCTAA  
146 TCC) and pooled. The pooled amplicons were cleaned with Ampure beads (Beckman Coulter Inc.,  
147 Fullerton, USA) and subsequently prepared for sequencing on the IonTorrent PGM using the  
148 manufacturer's instructions (Life Technologies, Inc., Carlsbad, CA, USA).

149 From the same DNA samples, total DNA was sheared into approximately 400 bp fragments via  
150 sonication. Resulting fragments were prepared for sequencing following the manufacturer's  
151 instructions with the Ion Plus Fragment Library Kit (Life technologies, Carlsbad, CA). Raw reads  
152 were submitted to NCBI and archived under the SRA accession number SRP099838.

### 153 Data analysis.

154 16S rRNA gene amplicons were quality filtered using QIIME v1.9 (Caporaso *et al.*, 2010). Quality  
155 controlled reads were then clustered into OTUs at a 97% identify and phylogenetically classified by  
156 utilizing the NINJA-OPS v1.3 pipeline (Al-Ghalith *et al.*, 2016). The reference database used for  
157 taxonomic assignment was the SILVA database version 123 (Quast *et al.*, 2013). The resulting OTU  
158 table was used for downstream analysis in R (R Core Team, 2016). Count data was normalized to  
159 relative abundances to account for differing sequence depth between samples and a square root  
160 transformation was applied. The *vegan* R package was used to calculate Shannon diversity with the  
161 *diversity* function, Bray-Curtis dissimilarity matrices with the *vegdist* function, and to estimate  
162 compositional variance with the *betadisper* function (Oksanen *et al.*, 2015). Principal component  
163 analysis (PCA) was performed using the *princomp* function in R. The *RandomForest* R package was  
164 used for classification and regression (Liaw and Wiener, 2002). Linear models were fit with the *glm*  
165 function in the *stats* package. Metagenomic reads were quality filtered ( $Q > 25$ ) and small fragments  
166 ( $< 100bp$ ) were removed using PrinSeq (Schmieder and Edwards, 2011).



## Nitrogen impacts on microbial function

167 The metagenomic reads were compared to custom nitrogen and methane cycling protein databases  
168 and the NCBI nr databases with Diamond (Buchfink *et al.*, 2014; Lüke *et al.*, 2016). A bit score ratio  
169 (BSR) between the hit to the custom databases and to the NCBI nr database was used to identify false  
170 positives hits. A strict BSR of 0.85 was used as a cutoff. Gene abundances were normalized and  
171 expressed relative to the single copy RNA polymerase *rpoB* gene abundance. These relative values  
172 were then scaled for comparison within genes. Reads from all metagenomes were assembled using  
173 metaSPAdes (version 3.7; Bankevich *et al.* 2012) and resulting contigs were compared against all  
174 publicly available Bacteroidetes, Acidobacteria and Verrucomicrobia genomes in the NCBI database  
175 using Blastn. Furthermore, contigs were assessed for the presence of N or CH<sub>4</sub> cycling genes by  
176 comparing them with Diamond to the previously mentioned N and CH<sub>4</sub> cycling custom databases.

## 177 Results

### 178 Plant physiology

179 *J. acutiflorus* and bulk soil were incubated over a course of 90 days. The soil collected from the  
180 sampling site and used in the incubations was a sandy soil with low organic matter content. Soil  
181 samples were taken at an initial time point (T<sub>0</sub>), a mid-point (T<sub>m</sub>; t = 45 days) and final time point (T<sub>f</sub>;  
182 t = 90 days) (Supplementary Table 1). By T<sub>m</sub>, *J. acutiflorus* incubations had significant root  
183 development throughout the incubated soil, and as a result the rhizosphere was sufficiently sampled  
184 such that the soil sampled was clearly dominated by root biomass. To determine the N utilization of  
185 the plants and to identify growth responses to N inputs, the total dry weight biomass of roots,  
186 rhizomes and shoots and total N and C content of *J. acutiflorus* tissue were measured from plants at  
187 T<sub>f</sub>. Although there was no significant difference in total biomass and root:shoot ratio of *J. acutiflorus*  
188 between incubations, the average total N content of plant tissue was approximately twice as high (65  
189 mg g<sup>-1</sup>) in incubations with a high N input (t = 2.66; p = 0.037; Supplementary Table 2).  
190 Correspondingly, total C:N (averaged across the whole plant) was significantly higher in *J.*  
191 *acutiflorus* incubations with a low N input (t = -2.964; p = 0.009; Supplementary Table 2).  
192 Interestingly, this elevated C:N ratio was observed only for rhizome and shoot tissue, while the root  
193 C:N did not significantly differ between incubations (Supplementary Table 2).

### 194 Greenhouse gas fluxes

195 To link greenhouse gas fluxes with microbial community structure, gas flux measurements were  
196 performed at the same time points as soil sampling. Greenhouse gases were measured in both light  
197 and dark conditions, at T<sub>m</sub> and T<sub>f</sub> for CO<sub>2</sub> and CH<sub>4</sub>, and at T<sub>f</sub> for N<sub>2</sub>O (Figure 1). Bulk soils generally  
198 did not have significant greenhouse gas fluxes (fluxes were not significantly different from 0) and  
199 will not further be discussed here. In the *J. acutiflorus* incubations, CO<sub>2</sub> fluxes followed a day-night  
200 rhythm. Daytime CO<sub>2</sub> fluxes were generally negative, indicating net CO<sub>2</sub> fixation, with the largest  
201 rates significantly higher in high N *J. acutiflorus* incubations at T<sub>f</sub> (t = -5.28, p = 0.005; Figure 1A).  
202 Under dark conditions, CO<sub>2</sub> fluxes were positive only under the high N treatment while other  
203 treatments were not significantly different from 0 (t = 3.52, p = 0.01; Figure 1B). CH<sub>4</sub> and N<sub>2</sub>O  
204 emissions did not vary between dark and light conditions and therefore these conditions will not be  
205 compared. CH<sub>4</sub> fluxes increased from T<sub>m</sub> to T<sub>f</sub> and emissions tended to be highest in the *J.*  
206 *acutiflorus* incubations with a high N input, however there was large variability in this group (t =  
207 2.165; p = 0.064; Figure 1C). N<sub>2</sub>O emissions were highest in the high N treatment (t = 2.56, p = 0.04;  
208 Figure 1D), while a negative N<sub>2</sub>O flux was observed in *J. acutiflorus* incubations receiving a low N  
209 input (Figure 1D).

### 210 Denitrification potential

## Nitrogen impacts on microbial function

211 To understand how increased N input influenced N cycling within bulk and *J. acutiflorus* rhizosphere  
212 soils, soil slurries were taken at  $T_f$  and their denitrification potential was measured. There was  
213 significantly higher  $N_2O$  production from slurries originating from high N treatment soils ( $t = 2.41$ ;  $p$   
214  $= 0.045$ ; Supplementary Figure 2). There was no significant difference in the  $N_2$  production between  
215 high or low N treatments ( $t = 0.32$ ;  $p = 0.75$ ; Supplementary Figure 2). Additionally, the average  
216  $N_2:N_2O$  ratio was approximately 10 times higher in low N input slurries ( $5.36 \pm 7.39$ ;  $N_2:N_2O$   
217 production) as compared to high N slurries ( $0.58 \pm 0.61$ ), though not significantly different at  $p <$   
218  $0.05$  ( $t = -1.84$ ;  $p = 0.11$ ; Supplementary Figure 2).

### 219 Microbial community structure

220 The v3-v4 fragment of the 16S rRNA gene was amplified and sequenced resulting in, on average,  
221 over 1100 post-quality control (QC) sequences per sample. Each sample contained on average 264  
222  $\pm 136$  Operational Taxonomic Units (OTUs  $\pm$  s.d.). Over the course of the incubation, the  
223 dominant microbial group changed (Figure 2A). Solibacterales were most abundant at  $T_0$  and at  $T_m$ ,  
224 but by  $T_f$  Rhizobiales became the prominent group (Figure 2B). On average, microbial diversity  
225 increased between  $T_m$  and  $T_f$ , ( $t = 2.516$ ;  $p = 0.0176$ ; Supplementary Figure 3A). Within each time  
226 point, diversity did not differ significantly between *J. acutiflorus* and bulk soil incubations, nor did N  
227 input have an impact (Supplementary Figure 3B+C). To assess how community composition varied  
228 across the different incubations, the Bray-Curtis dissimilarity index was used to calculate  
229 compositional differences between microbial communities. The compositional variation did not  
230 significantly vary between  $T_m$  and  $T_f$ , indicating that community variability did not change within the  
231 different experimental groups across time (Supplementary Figure 4A-C). The most variable  
232 communities were observed for low N *J. acutiflorus* incubations at  $T_m$ , which furthermore were  
233 significantly different from the low N input bulk soil incubations (Tukey's HSD;  $p = 0.0184$ ;  
234 Supplementary Figure 4B). At  $T_f$  there were no significant differences in community variation among  
235 bulk soil or *J. acutiflorus* incubations, or between low and high N loading.

### 236 Linking microbial community members to function

237 In order to understand how the microbial community members were linked to environmental  
238 conditions and greenhouse gas emissions, a random forest classifier was used to identify microbial  
239 taxa whose abundance was affected by N input, time of sampling or presence of *J. acutiflorus*.  
240 Additionally, random forest was also used for regression to determine connections between  
241 abundance of these groups and environmental conditions or greenhouse gas fluxes, and these  
242 associations were further analyzed by fitting linear models.

243 The top three microbial groups that significantly responded to N input were the Opitutales  
244 (Verrucomicrobia) and Sphingobacteriales (Bacteroidetes), which were more abundant in the high N  
245 treatment group, and G6 Acidobacteria, which were more abundant in the low N treatment (Figure  
246 2B; Table 1). More specifically, the relative abundances of these three orders could be linked to  $N_2O$   
247 emissions (Table 1). Opitutales and Sphingobacteriales were positively associated with  $N_2O$  fluxes,  
248 while a negative association was observed for the G6-Acidobacteria. In addition, Sphingobacteriales  
249 were correlated to  $CO_2$  fixation (Table 1).

250 The top bacterial order distinguishing microbial communities from rhizosphere and bulk soil were  
251 the Alphaproteobacterial Caulobacterales, which were more abundant in the rhizosphere than in bulk  
252 soil and had a negative association with elevated  $NO_3^-$  concentrations (Table 1). The Rhizobiales and  
253 Solibacterales orders of the Alphaproteobacteria class and Acidobacteria phylum, respectively, were  
254 most distinctive for the microbial communities sampled at  $T_m$  versus  $T_f$  (Figure 2; Table 1).

## Nitrogen impacts on microbial function

255 Rhizobiales abundance was negatively associated with CO<sub>2</sub> fluxes in dark conditions while the  
256 Solibacterales were correlated to pore water alkalinity, which is a proxy for anaerobic decomposition  
257 (Figure 2; Table 1).

### 258 Soil metagenomics

259 In addition to the 16S rRNA gene, total DNA was sequenced from 5 soils representing T<sub>0</sub>, and  
260 rhizosphere and bulk soil samples at T<sub>m</sub> and T<sub>f</sub> from the high N treatment. These libraries resulted in  
261 on average 1 million post-QC reads per library (Supplementary Table 3). In addition to statistically  
262 linking the abundance of microbial groups to environmental conditions and greenhouse gas fluxes via  
263 the 16S rRNA amplicon analyses, we wanted to identify the genetic potential for N and C cycling  
264 processes within the N-amended samples. Furthermore, we aimed at linking these genetic functions  
265 to the groups identified as being most strongly influenced by increased N loading. To do this, custom  
266 databases of genes involved in N and C cycling processes (Lüke et al., 2016) were used to identify  
267 metagenomic reads of major N (*amoA* and *hao*, involved in NH<sub>4</sub><sup>+</sup> oxidation; *narG*, *nirK*, *nirS*, *norB*  
268 and *nosZ*, involved in denitrification; *nrfA*, involved in dissimilatory nitrite reduction to ammonia;  
269 and *nifH*, involved in N fixation) and CH<sub>4</sub> cycling genes (*pmoA* and *mmoX*, involved in CH<sub>4</sub>  
270 oxidation; *phnGHI* and *mcrA*, involved in methanogenesis), and their abundance in the high N  
271 incubations (abbreviations found in Supplementary Table 5). There were no *nirS* detected in the  
272 dataset and only two reads annotated as *mcrA* were detected in the metagenomes from *J. acutiflorus*.  
273 All other N and CH<sub>4</sub> cycling genes were present. CH<sub>4</sub> cycling genes *pmoA*, *hao* and *phn* were most  
274 abundant in the initial soil and the *J. acutiflorus* rhizosphere (Supplemental Figure 5). Interestingly,  
275 the *nrfA* gene, involved in dissimilatory nitrite reduction to ammonia (DNRA) which competes with  
276 denitrification for nitrite, was least abundant in the initial soil and in the rhizosphere soil at the final  
277 time point. *amoA* was mostly abundant in bulk soil metagenomes and the initial soil.

278 In addition, over 4.8 million soil metagenome reads were assembled into 129,476 contigs with a  
279 maximum length of 23kbp and a mean length of 597bp (+/- 368bp). Assembled contigs were  
280 compared to publicly available bacterial genomes from the Bacteroidetes, Verrucomicrobia and  
281 Acidobacterial phyla to identify genome fragments derived from the species identified in our  
282 previous analysis. Across all metagenomes, 5454 reads mapped to 145 contigs which had high  
283 identity to a Subgroup 6 Acidobacterial genome (CP015136.1; 84.5 +/- 7.1% identity), 6831 and 22  
284 reads mapped to 352 and 5 contigs which aligned to an Opitutales (CP016094.1; 85.5 +/- 7.9%  
285 identity) and Sphingobacteriales (CP003349.1; 86.3 +/- 7.7% identity) genomes respectively  
286 (Supplementary Table 4).

### 287 1 Discussion

288 Greenhouse gas emissions remain a global challenge. A mechanistic understanding of the factors that  
289 alter microbial community structure and function, such as increased N input, is important in  
290 developing management strategies for greenhouse gas emissions. This is particularly important in  
291 ecosystems as extensive as wetlands. With an estimated area of up to 12.8 million km<sup>2</sup> worldwide,  
292 wetlands considerably contribute to the total terrestrial carbon storage (Zedler and Kercher, 2005;  
293 Nahlik and Fennessy, 2016). Here we studied the impact of increased N input on the microbial  
294 community and greenhouse gas fluxes from the rhizosphere of *Juncus acutiflorus*, a very common  
295 plant in European wetland ecosystems, and a model for other *Juncus* species globally. We found  
296 characteristic shifts in the microbial community structure and a stimulation of greenhouse gas fluxes  
297 in *J. acutiflorus* incubations in response to N input.

### 298 Plant physiological shifts as a response to high N inputs.

## Nitrogen impacts on microbial function

299 The plant plays a prominent role in the maintenance of the rhizosphere microbial community  
300 (Reinhold-Hurek *et al.*, 2015). Roots release oxygen through radial oxygen loss providing an oxic  
301 niche in otherwise anoxic wetland soils (Armstrong, 1971). Plants also release labile organic matter  
302 in the form of organic acids, neutral sugars and amino acids (Kamilova *et al.*, 2006; Jones, 1998).  
303 The composition of this organic matter structures the microbial community within the rhizosphere by  
304 providing different substrates for heterotrophic micro-organisms (Haichar *et al.*, 2008). The exuded  
305 organic acids also acidify the surrounding soil, preventing many microbial species from thriving  
306 within the rhizosphere, but also modifying nutrient availability (Marschner *et al.*, 1987; Petersen and  
307 Böttger, 1991). The quantity of organic matter released is closely associated with photosynthesis  
308 rates. As plants are often N limited in natural systems, relieving this limitation promotes plant growth  
309 (Reich *et al.*, 2006). In this study we observed that when incubated under high N input *J. acutiflorus*  
310 showed increased C fixation rates (Figure 1A) and plant tissue becomes saturated with N  
311 (Supplementary Table 2). This also suggests that *J. acutiflorus* without N limitation excretes larger  
312 amounts of labile carbon into the surrounding soil, which is also evident from the observed decreases  
313 in pore water pH in the high N incubations. Additionally, due to root derived oxygen, increased  
314 nitrification rates could contribute to this observed drop in pH (Lamers *et al.* 2012; Supplementary  
315 Figure 5). Together, higher N input could result in higher photosynthetic rates in *J. acutiflorus*  
316 specimens, likely depositing larger amounts of organic matter into surrounding soil, stimulating the  
317 heterotrophic microbial community in return (Figure 2; Figure 3).

### 318 Greenhouse gas fluxes as a result of high N input.

319 N availability has been shown to alter greenhouse gas emission dynamics in previous studies  
320 (Philippot *et al.*, 2009). Here we observed that greenhouse gas fluxes in *J. acutiflorus* incubations  
321 were stimulated as a response to increased N input (Figure 1). CO<sub>2</sub> fixation rates were highest in *J.*  
322 *acutiflorus* incubations with high N input in the light conditions, likely due to increased  
323 photosynthetic activity of the plant and photosynthetic microorganisms. In the dark, the same *J.*  
324 *acutiflorus* incubations showed elevated CO<sub>2</sub> emissions, likely due to increased plant and microbial  
325 respiration (Figure 1).

326 In this study, the highest CH<sub>4</sub> emissions were observed in *J. acutiflorus* incubations with high N  
327 input, although with high variability (Figure 1C). Still, the elevated emission rates suggest that the *J.*  
328 *acutiflorus* rhizosphere could become a net source of CH<sub>4</sub> under high N input. The total amount of  
329 CH<sub>4</sub> released reflects the sum of CH<sub>4</sub> production (methanogenesis) and consumption  
330 (methanotrophy). Methanogenesis has been linked to plant productivity, thought to be due to  
331 increased availability of labile organic carbon from photosynthate exudates (Whiting and Chanton,  
332 1993; Aulakh *et al.*, 2001). Furthermore, methanogens can be stimulated through an indirect priming  
333 mechanism. Labile organic matter from plant photosynthate can stimulate microbial activity  
334 responsible for degrading recalcitrant organic matter, which in turn makes this carbon source  
335 available to methanogens (Jenkinson *et al.*, 1985; Kotsyurbenko, 2005; Kotsyurbenko *et al.*, 1993;  
336 Tveit *et al.*, 2015). Alternatively, net CH<sub>4</sub> emissions can be increased by inhibiting CH<sub>4</sub>  
337 consumption, for instance through the competitive inhibition of the key enzyme methane  
338 monooxygenase by NH<sub>4</sub><sup>+</sup> (Bosse *et al.*, 1993; Conrad and Rothfuss, 1991).

339 The reduction of NO<sub>x</sub> to N<sub>2</sub> is often incomplete, resulting in the production of the greenhouse gas  
340 N<sub>2</sub>O. Incomplete denitrification occurs when microbial species do not utilize N<sub>2</sub>O as an electron  
341 acceptor either due to physiological constraints or induced by certain environmental conditions  
342 (Philippot, 2002; Wallenstein *et al.*, 2006). It has been observed that N fertilization has the largest  
343 impact on N<sub>2</sub>O emissions when considering all terrestrial ecosystems, with NO<sub>3</sub><sup>-</sup> availability being



## Nitrogen impacts on microbial function

344 the main driver (Liu and Greaver, 2009). As denitrification is largely a microbial process, the  
345 composition of the microbial community plays an important role in the total amount of N emitted  
346 from soils. Representatives from a diverse set of phyla are known to denitrify (Philippot, 2002;  
347 Philippot *et al.*, 2009) and denitrification rates are therefore considered to be robust to changes in the  
348 microbial community composition (Enwall *et al.*, 2005). Here we observed elevated N<sub>2</sub>O emissions  
349 in *J. acutiflorus* incubations under high N input, whereas there were negative N<sub>2</sub>O fluxes in the low  
350 N incubations. Interestingly, N<sub>2</sub>O emissions by bulk soil were not significantly influenced by the  
351 tested N regimes, indicating that *J. acutiflorus* plays a substantial role in stimulating N reducing  
352 microbial species, probably by supplying labile carbon. In addition there was an almost 10-fold shift  
353 in the release of N<sub>2</sub>O relative to N<sub>2</sub> as a response to N input suggesting a high N input can shift the  
354 community towards partial denitrifiers in the rhizosphere, which is important given the strong  
355 greenhouse potential of N<sub>2</sub>O.

### 356 Shifts in microbial community structure as a response to high N input.

357 Associating microbial metabolisms (i.e., those resulting in greenhouse gas emission) to the structure  
358 of microbial communities and abiotic factors defined by the environment is essential to predict how  
359 the structure and function of these microbial ecosystems may adapt to future conditions. Bulk and  
360 rhizosphere soils contain diverse microbial communities with equally diverse metabolisms (Philippot  
361 *et al.*, 2013; Torsvik and Øvreås, 2002). It remains a challenge to understand the role that key groups  
362 play in these systems, and how they affect their environment.

363 We link the abundance of three bacterial orders to N input and greenhouse gas emissions (Figure 2;  
364 Table 1). The verrucomicrobial Optitutales were associated with high N input and elevated N<sub>2</sub>O  
365 emissions. Members of this order are diversely associated with different rhizospheres, ranging from  
366 sugar cane to wetland plants (Dedysh *et al.*, 2006; van Passel *et al.*, 2011). They have been  
367 physiologically described as anaerobic polysaccharide utilizing bacteria that are capable of reducing  
368 NO<sub>3</sub><sup>-</sup> to NO<sub>2</sub><sup>-</sup> (Chin *et al.*, 2001). Apart from the O<sub>2</sub> derived from the plant roots, which is quickly  
369 consumed by aerobic heterotrophs, wetland soils are waterlogged systems resulting in an anoxic  
370 environment. Assembled sequences from the metagenomes obtained in this study aligned to an  
371 Optitutales genome (CP016094.1), which encodes NO<sub>3</sub><sup>-</sup> and NO<sub>2</sub><sup>-</sup> reductases. Additionally, two of  
372 our assembled contigs contained open reading frames for the copper-containing nitrite reductase  
373 (NirK). It is likely that members of this order are utilizing plant derived organic matter as their  
374 electron donor and NO<sub>3</sub><sup>-</sup> as their electron acceptor (Figure 3).

375 The Sphingobacteriales from the phylum Bacteroidetes were also overrepresented in the high N input  
376 incubations (Figure 2; Table 1). Sphingobacteriales are understood as copiotrophic bacteria, referring  
377 to their ability to metabolize a wide array of carbon sources and being present at high abundances in  
378 soils with high carbon availability (Fierer *et al.*, 2007b; Padmanabhan *et al.*, 2003). In the current  
379 study, the majority of organic matter would originate from the plant as the sandy soil used had low  
380 organic matter content. Rhizodeposition in this case would be very important to groups such as  
381 Sphingobacteriales, not only as a carbon source but as an O<sub>2</sub> source as Sphingobacteriales seem to be  
382 particularly sensitive to O<sub>2</sub> availability. When tested for cellulolytic activity in oxic or anoxic  
383 environments they were exclusively active in the oxic treatment, suggesting that this group may  
384 require oxygenated environments for carbon degradation (Schellenberger *et al.*, 2009). Here,  
385 Sphingobacteriales were more abundant in high N input incubations and were associated with N<sub>2</sub>O  
386 fluxes and higher CO<sub>2</sub> fixation rates, suggesting that they may benefit from oxygen and carbon  
387 derived from roots. In addition, multiple contigs from the soil metagenomes aligned to a  
388 Sphingobacteriales genome (CP003349.1), which encodes nitrate, nitrite, nitric oxide and nitrous

## Nitrogen impacts on microbial function

389 oxide reductases. Three of these contigs encoded NirKs homologous to one found in a  
390 Sphingobacteriales genome (LGEL01000245.1). Considering findings from this study and the  
391 literature, we hypothesize that Sphingobacteriales within the *J. acutiflorus* rhizosphere could be  
392 facultative anaerobes benefiting from the elevated carbon input from the roots and utilizing available  
393 NO<sub>x</sub> as electron acceptors (Figure 3).

394 G6 Acidobacteria were overrepresented in the low N input incubations and there was no significant  
395 difference in their abundance between bulk and rhizosphere soils. Unlike Opitutales and  
396 Sphingobacteriales, they were negatively correlated with N<sub>2</sub>O emissions (Figure 2; Table 1). While  
397 the G6 Acidobacteria group is not well studied, one genome (CP015136.1) was recently published  
398 (Huang *et al.*, 2016) and was shown to contain nitric and nitrous oxide reductases. 145 contigs of our  
399 metagenome aligned to this genome; however none of the assembled contigs encoded proteins  
400 involved in denitrification. Genomic and physiological studies of a closely related group (group 1  
401 Acidobacteria) showed that they were anaerobic organoheterotrophs capable of utilizing NO<sub>3</sub><sup>-</sup> for  
402 respiration and NH<sub>4</sub><sup>+</sup> as an N source (Dedysh *et al.*, 2012), and other Acidobacteria have also been  
403 described as important soil carbon and N cyclers. However, many N-cycling reactions are restricted  
404 to particular clades indicating that these functions are heterogeneously represented across the  
405 Acidobacteria phylum (Kielak *et al.*, 2016; Koch *et al.*, 2008). Alternatively, Acidobacteria can utilize  
406 C derived from autotrophic microorganisms in anoxic environments (Meisinger *et al.*, 2007). They  
407 have been reported to utilize various plant and microbe-derived polysaccharides, like xylan,  
408 cellobiose and gellan (Janssen *et al.*, 2002; Koch *et al.*, 2008) and thrive in various soils and  
409 rhizospheres, including anoxic soils with low pH (Fierer *et al.*, 2007a; Pankratov and Dedysh, 2010).  
410 The cultured representatives of Acidobacteria have low growth rates and appear to be adapted to  
411 oligotrophic environments (Fierer *et al.* 2007; Jones *et al.* 2009). Thus, G6 Acidobacteria may not be  
412 competitive under high N availability by fast-growing (partial) denitrifiers. Together, the G6-  
413 Acidobacteria may be involved in anaerobic degradation of organic carbon from autotrophic bacteria  
414 or plant biomass, and increased N availability might reduce this group's abundance (Figure 3).

### 415 **A model microbial food web within bulk soil and the *J. acutiflorus* rhizosphere.**

416 Increased N input poses a distinct threat to wetland ecosystems, contributing to the degradation of  
417 biodiversity and altering greenhouse gas emissions (Bobbink *et al.*, 1998; Philippot *et al.*, 2009).  
418 Plants, such as *J. acutiflorus*, influence the abundance and composition of micro-organisms living in  
419 the rhizosphere by exuding organic matter and releasing oxygen from their roots (Reinhold-Hurek *et al.*  
420 *et al.*, 2015). In the current study, N addition resulted in increased productivity of *J. acutiflorus*,  
421 stimulating the effect of the plant on the microbial community but also directly affecting microbial  
422 metabolism. Based on our observations and published knowledge, we built a model of the *J.*  
423 *acutiflorus* microbial food web indicating how N input impacts the soil microbial community (Figure  
424 3).

425 N fertilization can directly influence the soil microbial community by providing excess NH<sub>4</sub><sup>+</sup> and  
426 NO<sub>3</sub><sup>-</sup>. Previous studies have shown that *J. acutiflorus* prefers NH<sub>4</sub><sup>+</sup> over NO<sub>3</sub><sup>-</sup> as N source, leading to  
427 a surplus of NO<sub>3</sub><sup>-</sup> in the rhizosphere (Supplementary Figure 5; van Diggelen *et al.* 2016). This alters  
428 N cycling dynamics, favoring microbial species capable of rapidly reducing NO<sub>3</sub><sup>-</sup> to N<sub>2</sub>O rather than  
429 to N<sub>2</sub>. While complete denitrification supports higher growth yields, it also is energetically more  
430 costly and thus unfavorable under lower nutrient availability (i.e., K strategy life style). The  
431 combined effect of enhanced plant derived carbon input and higher N availability stimulates  
432 heterotrophic activity, resulting in increased N<sub>2</sub>O and CO<sub>2</sub> emissions (Figure 3). While excess NO<sub>3</sub><sup>-</sup>  
433 spurs anaerobic respiration, increased NH<sub>4</sub><sup>+</sup> concentrations can lead to an inhibition of methane

## Nitrogen impacts on microbial function

434 oxidation, possibly contributing to the heterogeneity observed in CH<sub>4</sub> emissions (Figure 1C). High N  
435 availability can also have an indirect effect by influencing plant physiology. The observed increased  
436 rates of carbon fixation by *J. acutiflorus* under high N input may result in augmented release of  
437 organic matter (including organic acids) and oxygen from the roots. This acidifies the rhizosphere  
438 soil, which can alter the activity of *nosZ* containing microbes (Liu *et al.*, 2014). Additionally,  
439 elevated oxygen availability stimulates heterotrophic activity in an otherwise anoxic environment,  
440 leading to higher CO<sub>2</sub> emissions. Thus, altered N input in the *J. acutiflorus* rhizosphere leads to  
441 increased greenhouse gas fluxes directly by altering the abundance of N-cycling species and  
442 indirectly through the stimulation of plant primary productivity (Figure 3).

## 443 CONCLUSIONS

444 With continued anthropogenic inputs of nitrogen into wetlands, it is critical to mechanistically  
445 understand how this activity may affect globally relevant carbon and nitrogen cycling within  
446 wetlands. The results here support that under high N input, greenhouse gas emissions from the *J.*  
447 *acutiflorus* rhizosphere increase, shifting the system from a greenhouse gas sink to a source. Three  
448 bacterial orders, the Opitutales, G6-Acidobacteria and Sphingobacteriales, respond to increased N  
449 availability and genomic evidence supports their involvement in processes leading to changes in  
450 greenhouse gas fluxes. Our view is that understanding interactions within the rhizosphere, that result  
451 in increased greenhouse gas emissions, is essential for creating management solutions aimed to  
452 address greenhouse gas emission goals, efficient agricultural practices, and conservation efforts. To  
453 move forward in our understanding of the complex dynamics within ecosystems such as the  
454 rhizosphere, future effort needs to be made in building extensive datasets that can be used to build  
455 predictive models of how these microbial ecosystems might respond under altered environmental  
456 conditions. We propose that mechanistic models, such as our *J. acutiflorus* rhizosphere plant-  
457 microbial food web model, should be used to set the framework for building such datasets.

## 458 Acknowledgements

459 We would like to thank Theo van Allen for sequencing support and Sebastian Krosse, Paul van der  
460 Ven, and General Instrumentation at Radboud University for support with elemental analysis.  
461 Funding was provided by the European Research Council (ERC AG 339880 ECOMOM) to  
462 M.S.M.J., and the Netherlands Organisation for Scientific Research (NOW) through Gravitation  
463 Grants SIAM (024.002.002), and NESSC (024.002.001) to M.S.M.J. and VENI grant 863.14.019 to  
464 S.L..

## 465 Author Contributions

466 EH, SFH, JvD, LL, MJ, CL, SL, CW designed research; EH, SFH, JvD performed research; EH,  
467 SFH, JvD analyzed data; EH, SL, CW wrote the paper; All authors reviewed and agreed with the  
468 final version of the manuscript.

## 469 Conflict of Interest

470 The authors declare no conflicts of interest.

## 471 Funding

472 This work was supported by the European Research Council (ERC AG 339880 ECOMOM) to  
473 M.S.M.J., and the Netherlands Organisation for Scientific Research (N.W.O) through Gravitation

## Nitrogen impacts on microbial function

474 Grants SIAM (024.002.002) and NESSC (024.002.001) to M.S.M.J. and VENI grant 863.14.019 to  
475 S.L..

### 476 References

477 Abou Seada MNI, Ottow JCG. (1985). Effect of increasing oxygen concentration on total  
478 denitrification and nitrous oxide release from soil by different bacteria. *Biol Fertil Soils* **1**: 31–38.

479 Al-Ghalith GA, Montassier E, Ward HN, Knights D. (2016). NINJA-OPS: Fast accurate marker gene  
480 alignment using concatenated ribosomes. *PLoS Comput Biol* **12**: e1004658.

481 Armstrong W. (1971). Radial oxygen losses from intact rice roots as affected by distance from the  
482 apex, respiration and waterlogging. *Physiol Plant* **25**: 192–197.

483 Aulakh MS, Wassmann R, Bueno C, Rennenberg H. (2001). Impact of root exudates of different  
484 cultivars and plant development stages of rice (*Oryza sativa* L.) on methane production in a paddy  
485 soil. *Plant Soil* **230**: 77–86.

486 Bankevich A, Nurk S, Antipov D, Gurevich AA, Dvorkin M, Kulikov AS, *et al.* (2012). SPAdes: A  
487 new genome assembly algorithm and Its applications to single-cell sequencing. *J Comput Biol* **19**:  
488 455–477.

489 Bardgett RD, van der Putten WH. (2014). Belowground biodiversity and ecosystem functioning.  
490 *Nature* **515**: 505–511.

491 Bobbink R, Hornung M, Roelofs JGM. (1998). The effects of air-borne nitrogen pollutants on species  
492 diversity in natural and semi-natural European vegetation. *J Ecol* **86**: 717–738.

493 Bodelier PLE, Laanbroek HJ. (2004). Nitrogen as a regulatory factor of methane oxidation in soils  
494 and sediments. *FEMS Microbiol Ecol* **47**.

495 Bosse U, Frenzel P, Conrad R. (1993). Inhibition of methane oxidation by ammonium in the surface  
496 layer of a littoral sediment. *FEMS Microbiol Ecol* **13**.

497 Bragazza L, Freeman C, Jones T, Rydin H, Limpens J, Fenner N, *et al.* (2006). Atmospheric nitrogen  
498 deposition promotes carbon loss from peat bogs. *Proc Natl Acad Sci U S A* **103**: 19386–19389.

499 Brenzinger K, Dörsch P, Braker G. (2015). PH-driven shifts in overall and transcriptionally active  
500 denitrifiers control gaseous product stoichiometry in growth experiments with extracted bacteria from  
501 soil. *Front Microbiol* **6**: 961.

502 Britto DT, Kronzucker HJ. (2002).  $\text{NH}_4^+$  toxicity in higher plants: a critical review. *J Plant Physiol*  
503 **159**: 567–584.

504 Buchfink B, Xie C, Huson DH. (2014). Fast and sensitive protein alignment using DIAMOND. *Nat*  
505 *Methods* **12**: 59–60.

506 Caporaso J, Kuczynski J, Stombaugh J. (2010). QIIME allows analysis of high-throughput  
507 community sequencing data. *Nat Methods* **7**: 335–336.

508 Chin KJ, Liesack W, Janssen PH. (2001). *Opiritatus terrae* gen. nov., sp. nov., to accommodate novel



## Nitrogen impacts on microbial function

- 509 strains of the division ‘Verrucomicrobia’ isolated from rice paddy soil. *Int J Syst Evol Microbiol* **51**:  
510 1965–1968.
- 511 Conrad R, Rothfuss F. (1991). Methane oxidation in the soil surface layer of a flooded rice field and  
512 the effect of ammonium. *Biol Fertil Soils* **12**: 28–32.
- 513 Curl EA, Harper JD. (1990). Fauna-microflora interactions. In: *The rhizosphere*. pp 369–388.
- 514 Dedysh SN, Kulichevskaya IS, Serkebaeva YM, Mityaeva MA, Sorokin V V., Suzina NE, *et al.*  
515 (2012). *Bryocella elongata* gen. nov., sp. nov., a member of subdivision 1 of the Acidobacteria  
516 isolated from a methanotrophic enrichment culture, and emended description of *Edaphobacter*  
517 *aggregans* Koch *et al.* 2008. *Int J Syst Evol Microbiol* **62**: 654–664.
- 518 Dedysh SN, Pankratov TA, Belova SE, Kulichevskaya IS, Liesack W. (2006). Phylogenetic analysis  
519 and in situ identification of bacteria community composition in an acidic Sphagnum peat bog. *Appl*  
520 *Environ Microbiol* **72**: 2110–2117.
- 521 van Diggelen JMH, Smolders AJP, Visser EJW, Hicks S, Roelofs JGM, Lamers LPM. (2016).  
522 Differential responses of two wetland graminoids to high ammonium at different pH values  
523 Hawkesford M (ed). *Plant Biol* **18**: 307–315.
- 524 Dunfield P, Knowles R. (1995). Kinetics of inhibition of methane oxidation by nitrate, nitrite, and  
525 ammonium in a humisol. *Appl Environ Microbiol* **61**: 3129–3135.
- 526 Enwall K, Philippot L, Hallin S. (2005). Activity and composition of the denitrifying bacterial  
527 community respond differently to long-term fertilization. *Appl Environ Microbiol* **71**: 8335–8343.
- 528 Fierer N, Bradford MA, Jackson RB. (2007a). Toward an ecological classification of soil bacteria.  
529 *Ecology* **88**: 1354–1364.
- 530 Fierer N, Breitbart M, Nulton J, Salamon P, Lozupone C, Jones R, *et al.* (2007b). Metagenomic and  
531 small-subunit rRNA analyses reveal the genetic diversity of bacteria, archaea, fungi, and viruses in  
532 soil. *Appl Environ Microbiol* **73**: 7059–7066.
- 533 Fierer N, Lauber CL, Ramirez KS, Zaneveld J, Bradford MA, Knight R. (2012). Comparative  
534 metagenomic, phylogenetic and physiological analyses of soil microbial communities across nitrogen  
535 gradients. *ISME J* **6**: 1007–1017.
- 536 Galloway JN, Townsend AR, Erisman JW, Bekunda M, Cai Z, Freney JR, *et al.* (2008).  
537 Transformation of the Nitrogen Cycle: Recent Trends, Questions, and Potential Solutions. *Science*  
538 (80- ) **320**: 889–892.
- 539 Haichar F el Z, Marol C, Berge O, Rangel-Castro JI, Prosser JI, Balesdent J, *et al.* (2008). Plant host  
540 habitat and root exudates shape soil bacterial community structure. *ISME J* **2**: 1221–1230.
- 541 Van den Heuvel RN, Bakker SE, Jetten MSM, Hefting MM. (2011). Decreased N<sub>2</sub>O reduction by  
542 low soil pH causes high N<sub>2</sub>O emissions in a riparian ecosystem. *Geobiology* **9**: 294–300.
- 543 Hinsinger P, Bengough AG, Vetterlein D, Young IM. (2009). Rhizosphere: biophysics,  
544 biogeochemistry and ecological relevance. *Plant Soil* **321**: 117–152.

## Nitrogen impacts on microbial function

- 545 Hoagland DR, Arnon DI. (1950). The water-culture method for growing plants without soil. *Calif*  
546 *Agric Exp Stn Circ* **347**: 1–32.
- 547 Huang S, Vieira S, Bunk B, Riedel T, Spröer C, Overmann J. (2016). First Complete Genome  
548 Sequence of a Subdivision 6 Acidobacterium Strain. *Genome Announc* **4**: e00469-16.
- 549 Janssen PH, Yates PS, Grinton BE, Taylor PM, Sait M. (2002). Improved culturability of soil  
550 bacteria and isolation in pure culture of novel members of the divisions Acidobacteria,  
551 Actinobacteria, Proteobacteria, and Verrucomicrobia. *Appl Environ Microbiol* **68**: 2391–2396.
- 552 Jenkinson DS, Fox RH, Rayner JH. (1985). Interactions between fertilizer nitrogen and soil  
553 nitrogen—the so-called ‘priming’ effect. *J Soil Sci* **36**: 425–444.
- 554 Jones DL. (1998). Organic acids in the rhizosphere – a critical review. *Plant Soil* **205**: 25–44.
- 555 Jones RT, Robeson MS, Lauber CL, Hamady M, Knight R, Fierer N. (2009). A comprehensive  
556 survey of soil acidobacterial diversity using pyrosequencing and clone library analyses. *ISME J* **3**:  
557 442–453.
- 558 Kamilova F, Kravchenko L V., Shaposhnikov AI, Azarova T, Makarova N, Lugtenberg B. (2006).  
559 Organic acids, sugars, and l-Tryptophane in exudates of vegetables growing on stonewool and their  
560 effects on activities of rhizosphere bacteria. *Mol Plant-Microbe Interact* **19**: 250–256.
- 561 Kielak AM, Barreto CC, Kowalchuk GA, van Veen JA, Kuramae EE. (2016). The ecology of  
562 Acidobacteria: moving beyond genes and genomes. *Front Microbiol* **7**: 744.
- 563 King GM, Schnell S. (1998). Effects of ammonium and non-ammonium salt additions on methane  
564 oxidation by *Methylosinus trichosporium* OB3b and maine forest soils. *Appl Environ Microbiol* **64**:  
565 253–257.
- 566 Koch IH, Gich F, Dunfield PF, Overmann J. (2008). *Edaphobacter modestus* gen. nov., sp. nov., and  
567 *Edaphobacter aggregans* sp. nov., acidobacteria isolated from alpine and forest soils. *Int J Syst Evol*  
568 *Microbiol* **58**: 1114–1122.
- 569 Kotsyurbenko OR. (2005). Trophic interactions in the methanogenic microbial community of low-  
570 temperature terrestrial ecosystems. *FEMS Microbiol Ecol* **53**: 3–13.
- 571 Kotsyurbenko OR, Nozhevnikova AN, Zavarzin GA. (1993). Methanogenic degradation of organic  
572 matter by anaerobic bacteria at low temperature. *Chemosphere* **27**: 1745–1761.
- 573 Lamers LPM, van Diggelen JMH, Op den Camp HJM, Visser EJW, Lucassen ECHET, Vile MA, *et*  
574 *al.* (2012). Microbial transformations of nitrogen, sulfur, and iron dictate vegetation composition in  
575 wetlands: a review. *Front Microbiol* **3**: 156.
- 576 Leff JW, Jones SE, Prober SM, Barberán A, Borer ET, Firn JL, *et al.* (2015). Consistent responses of  
577 soil microbial communities to elevated nutrient inputs in grasslands across the globe. *Proc Natl Acad*  
578 *Sci U S A* **112**: 10967–10972.
- 579 Liaw A, Wiener M. (2002). Classification and regression by randomForest. *R news* **2**: 18–22.
- 580 Liu B, Frostegård Å, Bakken LR. (2014). Impaired reduction of N<sub>2</sub>O to N<sub>2</sub> in acid soils is due to a

## Nitrogen impacts on microbial function

- 581 posttranscriptional interference with the expression of *nosZ*. *MBio* **5**: e01383-14.
- 582 Liu L, Greaver TL. (2009). A review of nitrogen enrichment effects on three biogenic GHGs: the  
583 CO<sub>2</sub> sink may be largely offset by stimulated N<sub>2</sub>O and CH<sub>4</sub> emission. *Ecol Lett* **12**: 1103–1117.
- 584 Lüke C, Speth DR, Kox MAR, Villanueva L, Jetten MSM. (2016). Metagenomic analysis of nitrogen  
585 and methane cycling in the Arabian Sea oxygen minimum zone. *PeerJ* **4**: e1924.
- 586 Marschner H, Romheld V, Cakmak I. (1987). Root-induced changes of nutrient availability in the  
587 rhizosphere. *J Plant Nutr* **10**: 1175–1184.
- 588 Meisinger DB, Zimmermann J, Ludwig W, Schleifer K-H, Wanner G, Schmid M, *et al.* (2007). In  
589 situ detection of novel Acidobacteria in microbial mats from a chemolithoautotrophically based cave  
590 ecosystem (Lower Kane Cave, WY, USA). *Environ Microbiol* **9**: 1523–1534.
- 591 Nahlik AM, Fennessy MS. (2016). Carbon storage in US wetlands. *Nat Commun* **7**: 13835.
- 592 Oksanen J, Blanchet FG, Kindt R. (2015). Vegan Package.
- 593 Padmanabhan P, Padmanabhan S, DeRito C, Gray A, Gannon D, Snape JR, *et al.* (2003). Respiration  
594 of <sup>13</sup>C-labeled substrates added to soil in the field and subsequent 16S rRNA gene analysis of <sup>13</sup>C-  
595 labeled soil DNA. *Appl Environ Microbiol* **69**: 1614–1622.
- 596 Pankratov TA, Dedysh SN. (2010). *Granulicella paludicola* gen. nov., sp. nov., *Granulicella*  
597 *pectinivorans* sp. nov., *Granulicella aggregans* sp. nov. and *Granulicella rosea* sp. nov., acidophilic,  
598 polymer-degrading acidobacteria from Sphagnum peat bogs. *Int J Syst Evol Microbiol* **60**: 2951–  
599 2959.
- 600 van Passel MWJ, Kant R, Palva A, Copeland A, Lucas S, Lapidus A, *et al.* (2011). Genome sequence  
601 of the verrucomicrobium *Opitutus terrae* PB90-1, an abundant inhabitant of rice paddy soil  
602 ecosystems. *J Bacteriol* **193**: 2367–2368.
- 603 Petersen W, Böttger M. (1991). Contribution of organic acids to the acidification of the rhizosphere  
604 of maize seedlings. *Plant Soil* **132**: 159–163.
- 605 Philippot L. (2002). Denitrifying genes in bacterial and Archaeal genomes. *Biochim Biophys Acta -*  
606 *Gene Struct Expr* **1577**: 355–376.
- 607 Philippot L, Hallin S, Börjesson G, Baggs EM. (2009). Biochemical cycling in the rhizosphere  
608 having an impact on global change. *Plant Soil* **321**: 61–81.
- 609 Philippot L, Raaijmakers JM, Lemanceau P, van der Putten WH. (2013). Going back to the roots: the  
610 microbial ecology of the rhizosphere. *Nat Rev Microbiol* **11**: 789–799.
- 611 Quast C, Pruesse E, Yilmaz P, Gerken J, Schweer T, Yarza P, *et al.* (2013). The SILVA ribosomal  
612 RNA gene database project: improved data processing and web-based tools. *Nucleic Acids Res* **41**:  
613 D590-D596.
- 614 R Core Team. (2016). R: A language and environment for statistical computing. *R Found Stat*  
615 *Comput Vienna, Austria*. e-pub ahead of print, doi: 10.1038/sj.hdy.6800737.

## Nitrogen impacts on microbial function

- 616 Ramirez KS, Craine JM, Fierer N. (2012). Consistent effects of nitrogen amendments on soil  
617 microbial communities and processes across biomes. *Glob Chang Biol* **18**: 1918–1927.
- 618 Ramsay JO, Heckman N, Silverman BW. (1997). Spline smoothing with model-based penalties.  
619 *Behav Res Methods, Instruments, Comput* **29**: 99–106.
- 620 Reich PB, Hobbie SE, Lee T, Ellsworth DS, West JB, Tilman D, *et al.* (2006). Nitrogen limitation  
621 constrains sustainability of ecosystem response to CO<sub>2</sub>. *Nature* **440**: 922–925.
- 622 Reinhold-Hurek B, Bünger W, Burbano CS, Sabale M, Hurek T. (2015). Roots Shaping Their  
623 Microbiome: Global Hotspots for Microbial Activity. *Annu Rev Phytopathol* **53**: 403–424.
- 624 Robinson D, Hodge A, Fitter A. (2003). Constraints on the form and function of root systems. In:  
625 Springer Berlin Heidelberg, pp 1–31.
- 626 Schellenberger S, Kolb S, Drake HL. (2009). Metabolic responses of novel cellulolytic and  
627 saccharolytic agricultural soil Bacteria to oxygen. *Environ Microbiol* **12**: 845–861.
- 628 Schmieder R, Edwards R. (2011). Quality control and preprocessing of metagenomic datasets.  
629 *Bioinformatics* **27**: 863–4.
- 630 Smith CJ, Delaune RD. (1984). Influence of the rhizosphere of *Spartina alterniflora* Loisel. On  
631 nitrogen loss from a Louisiana Gulf Coast salt marsh. *Environ Exp Bot* **24**: 91–93.
- 632 Soons MB, Hefting MM, Dorland E, Lamers LPM, Versteeg C, Bobbink R. (2016). Nitrogen effects  
633 on plant species richness in herbaceous communities are more widespread and stronger than those of  
634 phosphorus. *Biol Conserv.* e-pub ahead of print, doi: 10.1016/j.biocon.2016.12.006.
- 635 Torsvik V, Øvreås L. (2002). Microbial diversity and function in soil: from genes to ecosystems.  
636 *Curr Opin Microbiol* **5**: 240–245.
- 637 Tveit AT, Urich T, Frenzel P, Svenning MM. (2015). Metabolic and trophic interactions modulate  
638 methane production by Arctic peat microbiota in response to warming. *Proc Natl Acad Sci U S A*  
639 **112**: E2507-2516.
- 640 Verhoeven J.T., Arheimer, B., Yin, C., & Hefting, M. M. (2006). Regional and global concerns over  
641 wetlands and water quality. *Trends in ecology and evolution*, 21(2), 96-103.
- 642 Wallenstein MD, Myrold DD, Firestone M, Voytek M. (2006). Environmental controls on  
643 denitrifying communities and denitrification rates: Insights from molecular methods. *Ecol Appl* **16**:  
644 2143–2152.
- 645 Whiting GJ, Chanton JP. (1993). Primary production control of methane emission from wetlands.  
646 *Nature* **364**: 794–795.
- 647 Zedler JB, Kercher S. (2005). Wetland resources: status, trends, ecosystem services, and restorability.  
648 *Annu Rev Environ Resour* **30**: 39–74.
- 649



## Nitrogen impacts on microbial function

### 650 **Figures**

#### 651 **Figure 1. CO<sub>2</sub>, CH<sub>4</sub> and N<sub>2</sub>O fluxes.**

652 Greenhouse gas fluxes were measured at a midpoint (T<sub>m</sub>) and final time point (T<sub>f</sub>) during the 90 day  
653 incubation experiment. (A) CO<sub>2</sub> light conditions, (B) CO<sub>2</sub> dark conditions, (C) CH<sub>4</sub> and (D) N<sub>2</sub>O.  
654 Asterisks denote significant differences (p < 0.05).

#### 655 **Figure 2. Microbial community structure and diversity.**

656 (A) Overview of microbial community structure of the initial soil sample (I), *J. acutiflorus*  
657 rhizosphere and bulk soil incubations receiving high or low N input at midpoint (T<sub>m</sub>) and final time  
658 point (T<sub>f</sub>). (B). Principal component analysis of the microbial community members distinguishing  
659 high and low N treatments and midpoint and final sampling time points. Points indicate individual  
660 samples taken. Red dashed arrows indicate environmental and gas fluxes that corresponded variation  
661 in microbial community member's abundance along the respective axis.

#### 662 **Figure 3. A *Juncus acutiflorus* rhizosphere microbial food web model.**

663 In the model of the *J. acutiflorus* rhizosphere, microbial processes are directly (red lines) or indirectly  
664 (black lines) influences by N deposition. *J. acutiflorus* preferentially takes up NH<sub>4</sub><sup>+</sup> which stimulates  
665 plant productivity and rhizodeposition of organic matter and oxygen (Van Diggelen et al., 2015).  
666 Released oxygen and labile organic matter contribute to soil acidification in addition to stimulating  
667 complex polymer degradation (Sphingobacteriales) and heterotrophic denitrifiers (Opitutales). The  
668 production of N<sub>2</sub> can be affected by a drop in pH which influences the activity of complete  
669 denitrifiers. The Group-6 Acidobacteria are outcompeted at higher N availability. Recalcitrant  
670 organic matter degraded by Sphingobacteriales can enter the microbial food web and be fermented by  
671 fermenters that in turn provide substrates for methanogens (*mcr*). The activity of phosphonate lyases  
672 (*phn*) might also stimulate the production of methane while anaerobic methane oxidation also  
673 contributes to methane consumption. Additionally, methane consumption by aerobic methanotrophs

## Nitrogen impacts on microbial function

674 through methane monooxygenases (*pmo*) could be inhibited by excess  $\text{NH}_4^+$  (Dunfield and Knowles  
675 1995).

### 676 **Supplemental Material**

#### 677 **Supplemental Table 1.**

678 Sample overview containing the time of sampling, N load treatment and whether or the sample was  
679 bulk or rhizosphere soil. Additionally, the number of post quality filtered reads that were produced  
680 and the number of OTUs found in each sample. Finally, greenhouse gas fluxes are reported in ( $\mu\text{mol}$   
681  $\text{m}^{-2} \text{d}^{-1}$ ).

#### 682 **Supplemental Table 2.**

683 Plant average dry weight and C:N were determined in different sections of the plant including the  
684 roots, shoots and rhizomes. Biomass weight was determined as dry weight. The mean values from  
685 plants receiving high N and low N are reported (Mean\_High and Mean\_Low). The p-value is  
686 reported as a result of a t-test comparing mean values from high and low N treatments.

#### 687 **Supplemental Table 3.**

688 Metagenome library overview including the time of sampling (Time), number of post-QC reads  
689 (Reads), average length (Avg\_len) and the standard deviation in read length (Sd\_len).

#### 690 **Supplemental Table 4.**

691 Number of reads and contigs assigned to one of three publicly available soil bacterial genomes.

692 Number of reads each metagenome contained are reported as well as the number of contigs that were  
693 assembled that aligned to these genomes.

#### 694 **Supplemental Table 5.**

695 Gene abbreviations.

### 696 **Supplemental Figures**

## **Nitrogen impacts on microbial function**

### 697 **Supplemental Figure 1.**

698 Experimental design schema depicting sample replicates per treatment in either  
699 rhizosphere/bulk soil. Additionally, the sampling points are denoted by colored boxes.

### 700 **Supplemental Figure 2.**

701 The Shannon diversity index ( $H'$ ) was calculated for all microbial communities. The Shannon  
702 diversity of all samples was compared from  $T_m$  and  $T_f$  (A). Diversity of experimental groups  
703 (High/Low N + Rhizosphere/Bulk) of all  $T_m$  (B) and  $T_f$  (C) samples were compared using multiple  
704 comparisons

### 705 **Supplemental Figure 3.**

706 Microbial community variation was estimated by calculating the Bray-Curtis dissimilarity for each  
707 sample in a pairwise fashion resulting in a square distance matrix. These pairwise distances were then  
708 reduced to two dimensions using multidimensional scaling. A centroid was calculated for each group  
709 being compared and each sample's Euclidean distance to its respective group centroid was  
710 calculated.  $T_m$  and  $T_f$  were compared in panel A,  $T_m$  (B) and  $T_f$  (C) samples were compared within  
711 respective groups (High/Low N + Rhizosphere/Bulk)

### 712 **Supplemental Figure 4. Denitrification potential from soil slurries.**

713  $N_2$  and  $N_2O$  production rates were estimated to determine potential denitrification of the soil and  
714 rhizosphere microbial communities.

### 715 **Supplemental Figure 5. Heatmap of C and N cycling gene abundance from metagenomes.**

716 **Metagenome of Initial, N-loaded rhizosphere representative (at  $T_m/T_f$ ), N-loaded bulk soil**  
717 **representative (at  $T_m/T_f$ ). Supplemental Figure 6. Pore water inorganic nutrients, pH and**  
718 **alkalinity.**

719 Concentration of inorganic nutrients, pH and alkalinity in pore water sampled throughout the  
720 incubation.

721 **Table 1. Correlations of microbial community members to environmental conditions and greenhouse gas fluxes.**  
 722 The mean relative abundance of top bacterial families distinguishing high v low N, rhizosphere v bulk soil or  $T_m$  v  $T_f$  sampling time points  
 723 are indicated as is the t-test result and statistics. Additionally, the top environmental or functional traits correlated with these groups were  
 724 reported along with linear model statistics.

|                                                  | t     | p-value | Mean Relative Abundance |       | Correlate                     | adj R2 | coef      | p-value |
|--------------------------------------------------|-------|---------|-------------------------|-------|-------------------------------|--------|-----------|---------|
|                                                  |       |         | High N                  | Low N |                               |        |           |         |
| <b><i>High versus low N</i></b>                  |       |         |                         |       |                               |        |           |         |
| Opitutales                                       | 4.17  | < 0.001 | 0.040                   | 0.010 | N <sub>2</sub> O              | 0.11   | 3.50E-04  | 0.012   |
| G6-Acidobacteria                                 | -4.22 | < 0.001 | 0.007                   | 0.020 | N <sub>2</sub> O              | 0.19   | -3.18E-05 | 0.058   |
| Sphingobacteriales                               | 2.88  | 0.008   | 0.010                   | 0.005 | N <sub>2</sub> O              | 0.32   | 3.10E-05  | 0.016   |
|                                                  |       |         |                         |       | CO <sub>2</sub> (fixation)    |        |           |         |
| <b><i>Rhizosphere versus bulk</i></b>            |       |         |                         |       |                               |        |           |         |
| Caulobacterales                                  | -3.46 | 0.002   | 0.052                   | 0.032 | NO <sub>3</sub> <sup>-</sup>  | 0.21   | -8.50E-05 | 0.003   |
| <b><i>T<sub>m</sub> versus T<sub>f</sub></i></b> |       |         |                         |       |                               |        |           |         |
| Rhizobiales                                      | 6.66  | < 0.001 | 0.099                   | 0.184 | CO <sub>2</sub> (respiration) | 0.27   | -6.40E-04 | 0.001   |
| Solibacterales                                   | -4.76 | < 0.001 | 0.179                   | 0.116 | Alkalinity                    | 0.26   | -2.00E-02 | 0.002   |

725

726



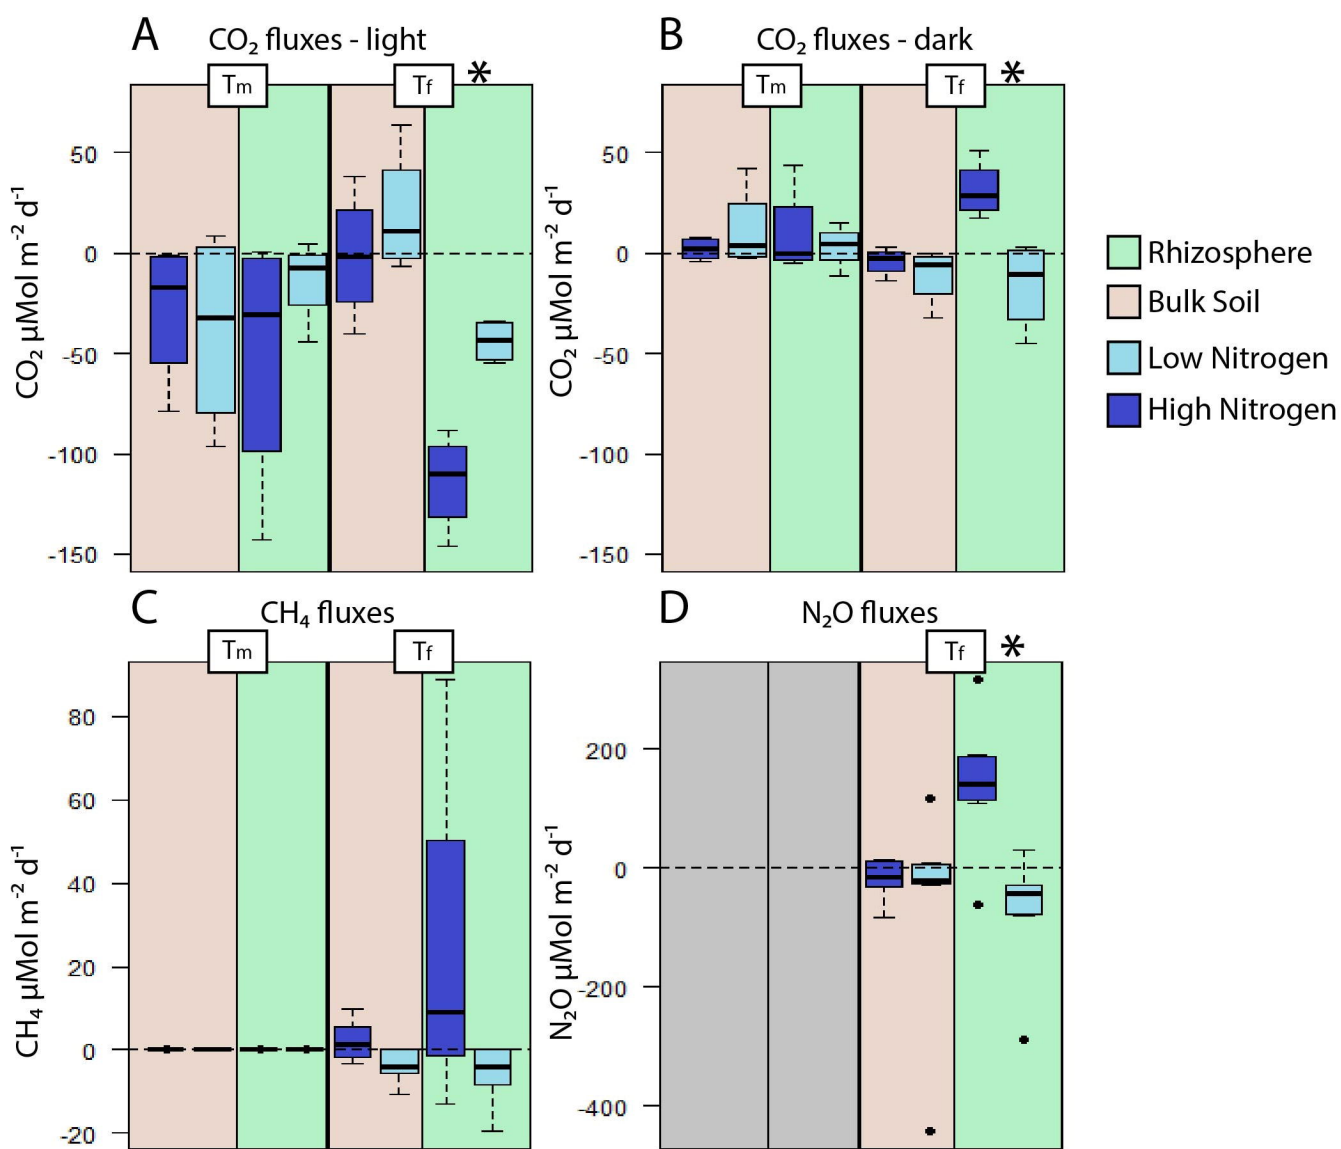

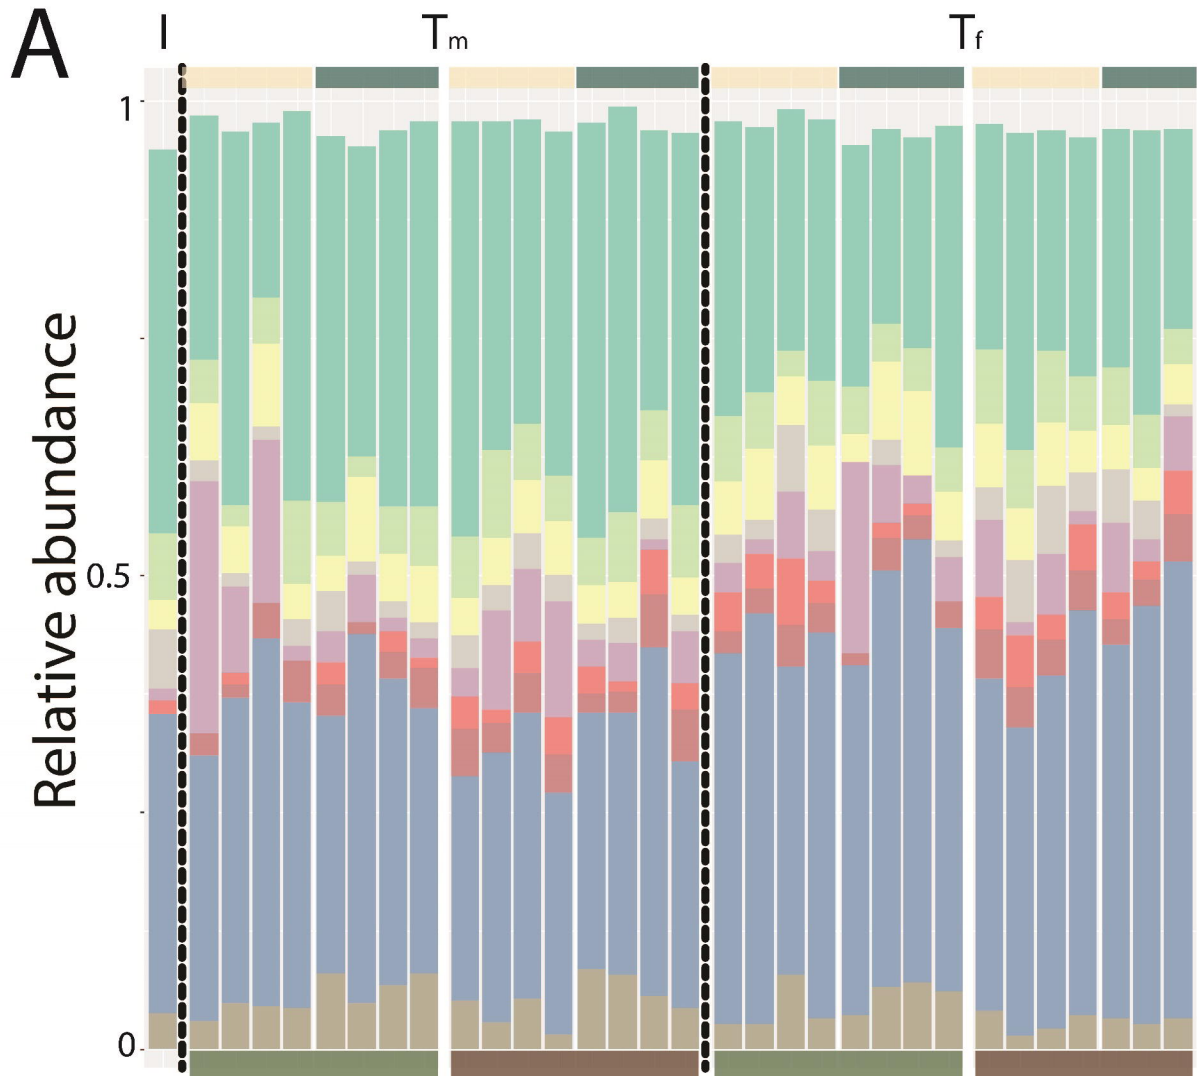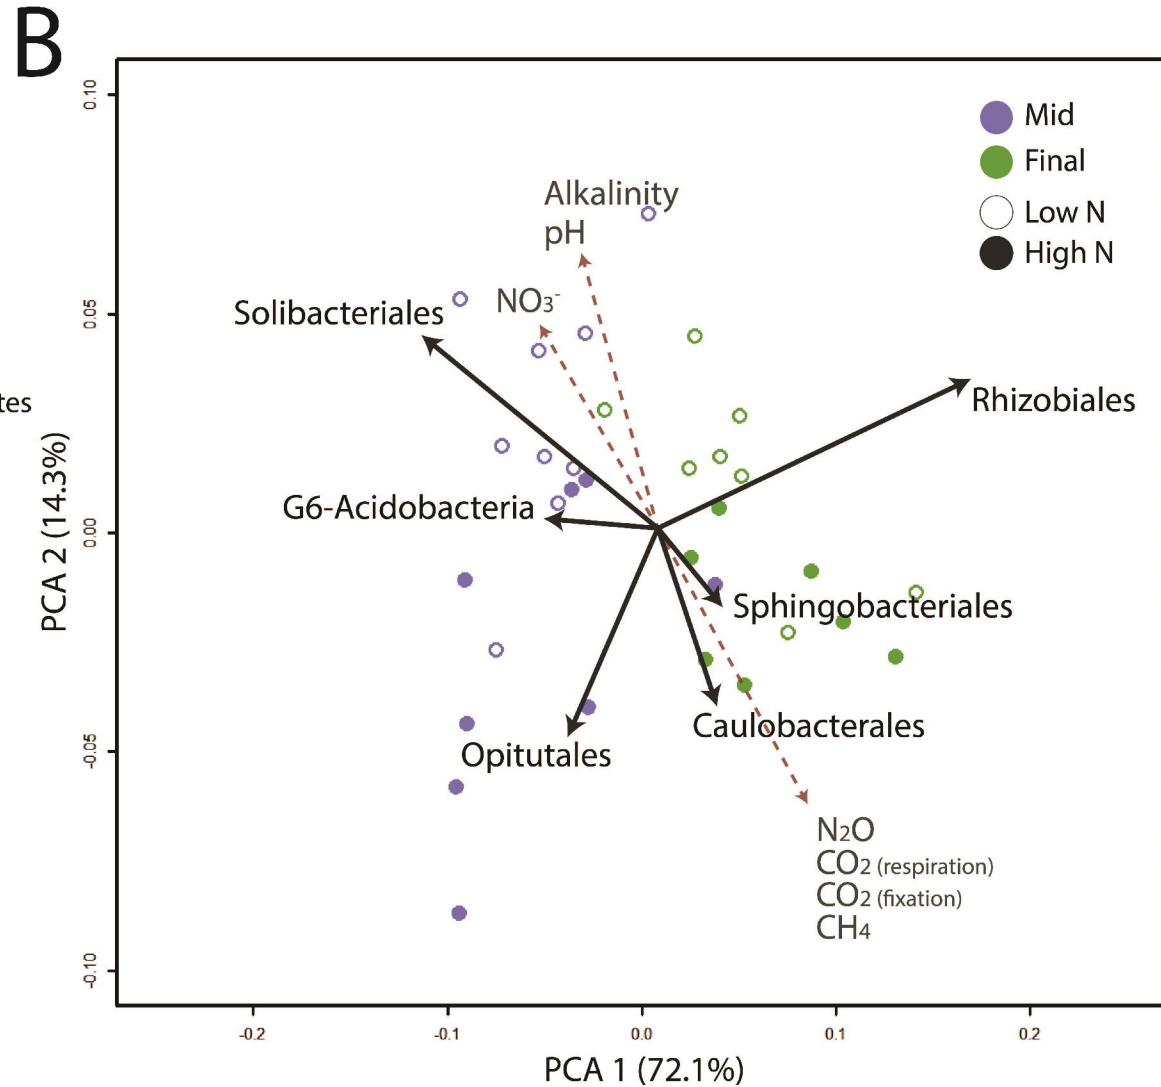



Effect of N addition

- Direct
- Indirect
- ⋯ Inhibition

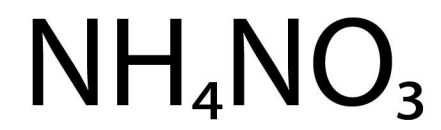

Water layer

Oxic Zone

Anoxic Zone

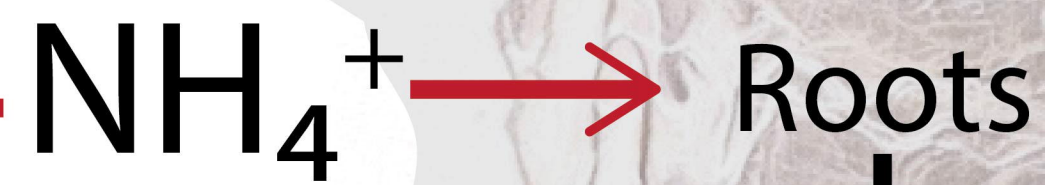

Organic Matter → pH↓

VI-Acidobacteria

Sphingobacteriales

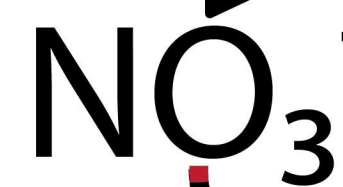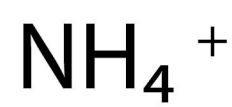

Opitutales

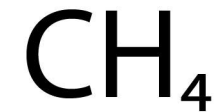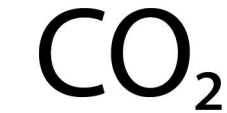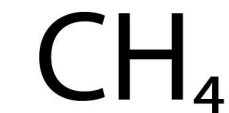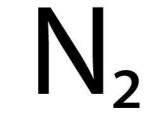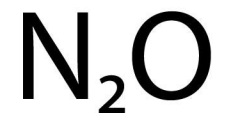

bioRxiv preprint doi: <https://doi.org/10.1101/197355>; this version posted October 4, 2017. The copyright holder for this preprint (which was not certified by peer review) is the author/funder, who has granted bioRxiv a license to display the preprint in perpetuity. It is made available under aCC-BY-NC 4.0 International license.

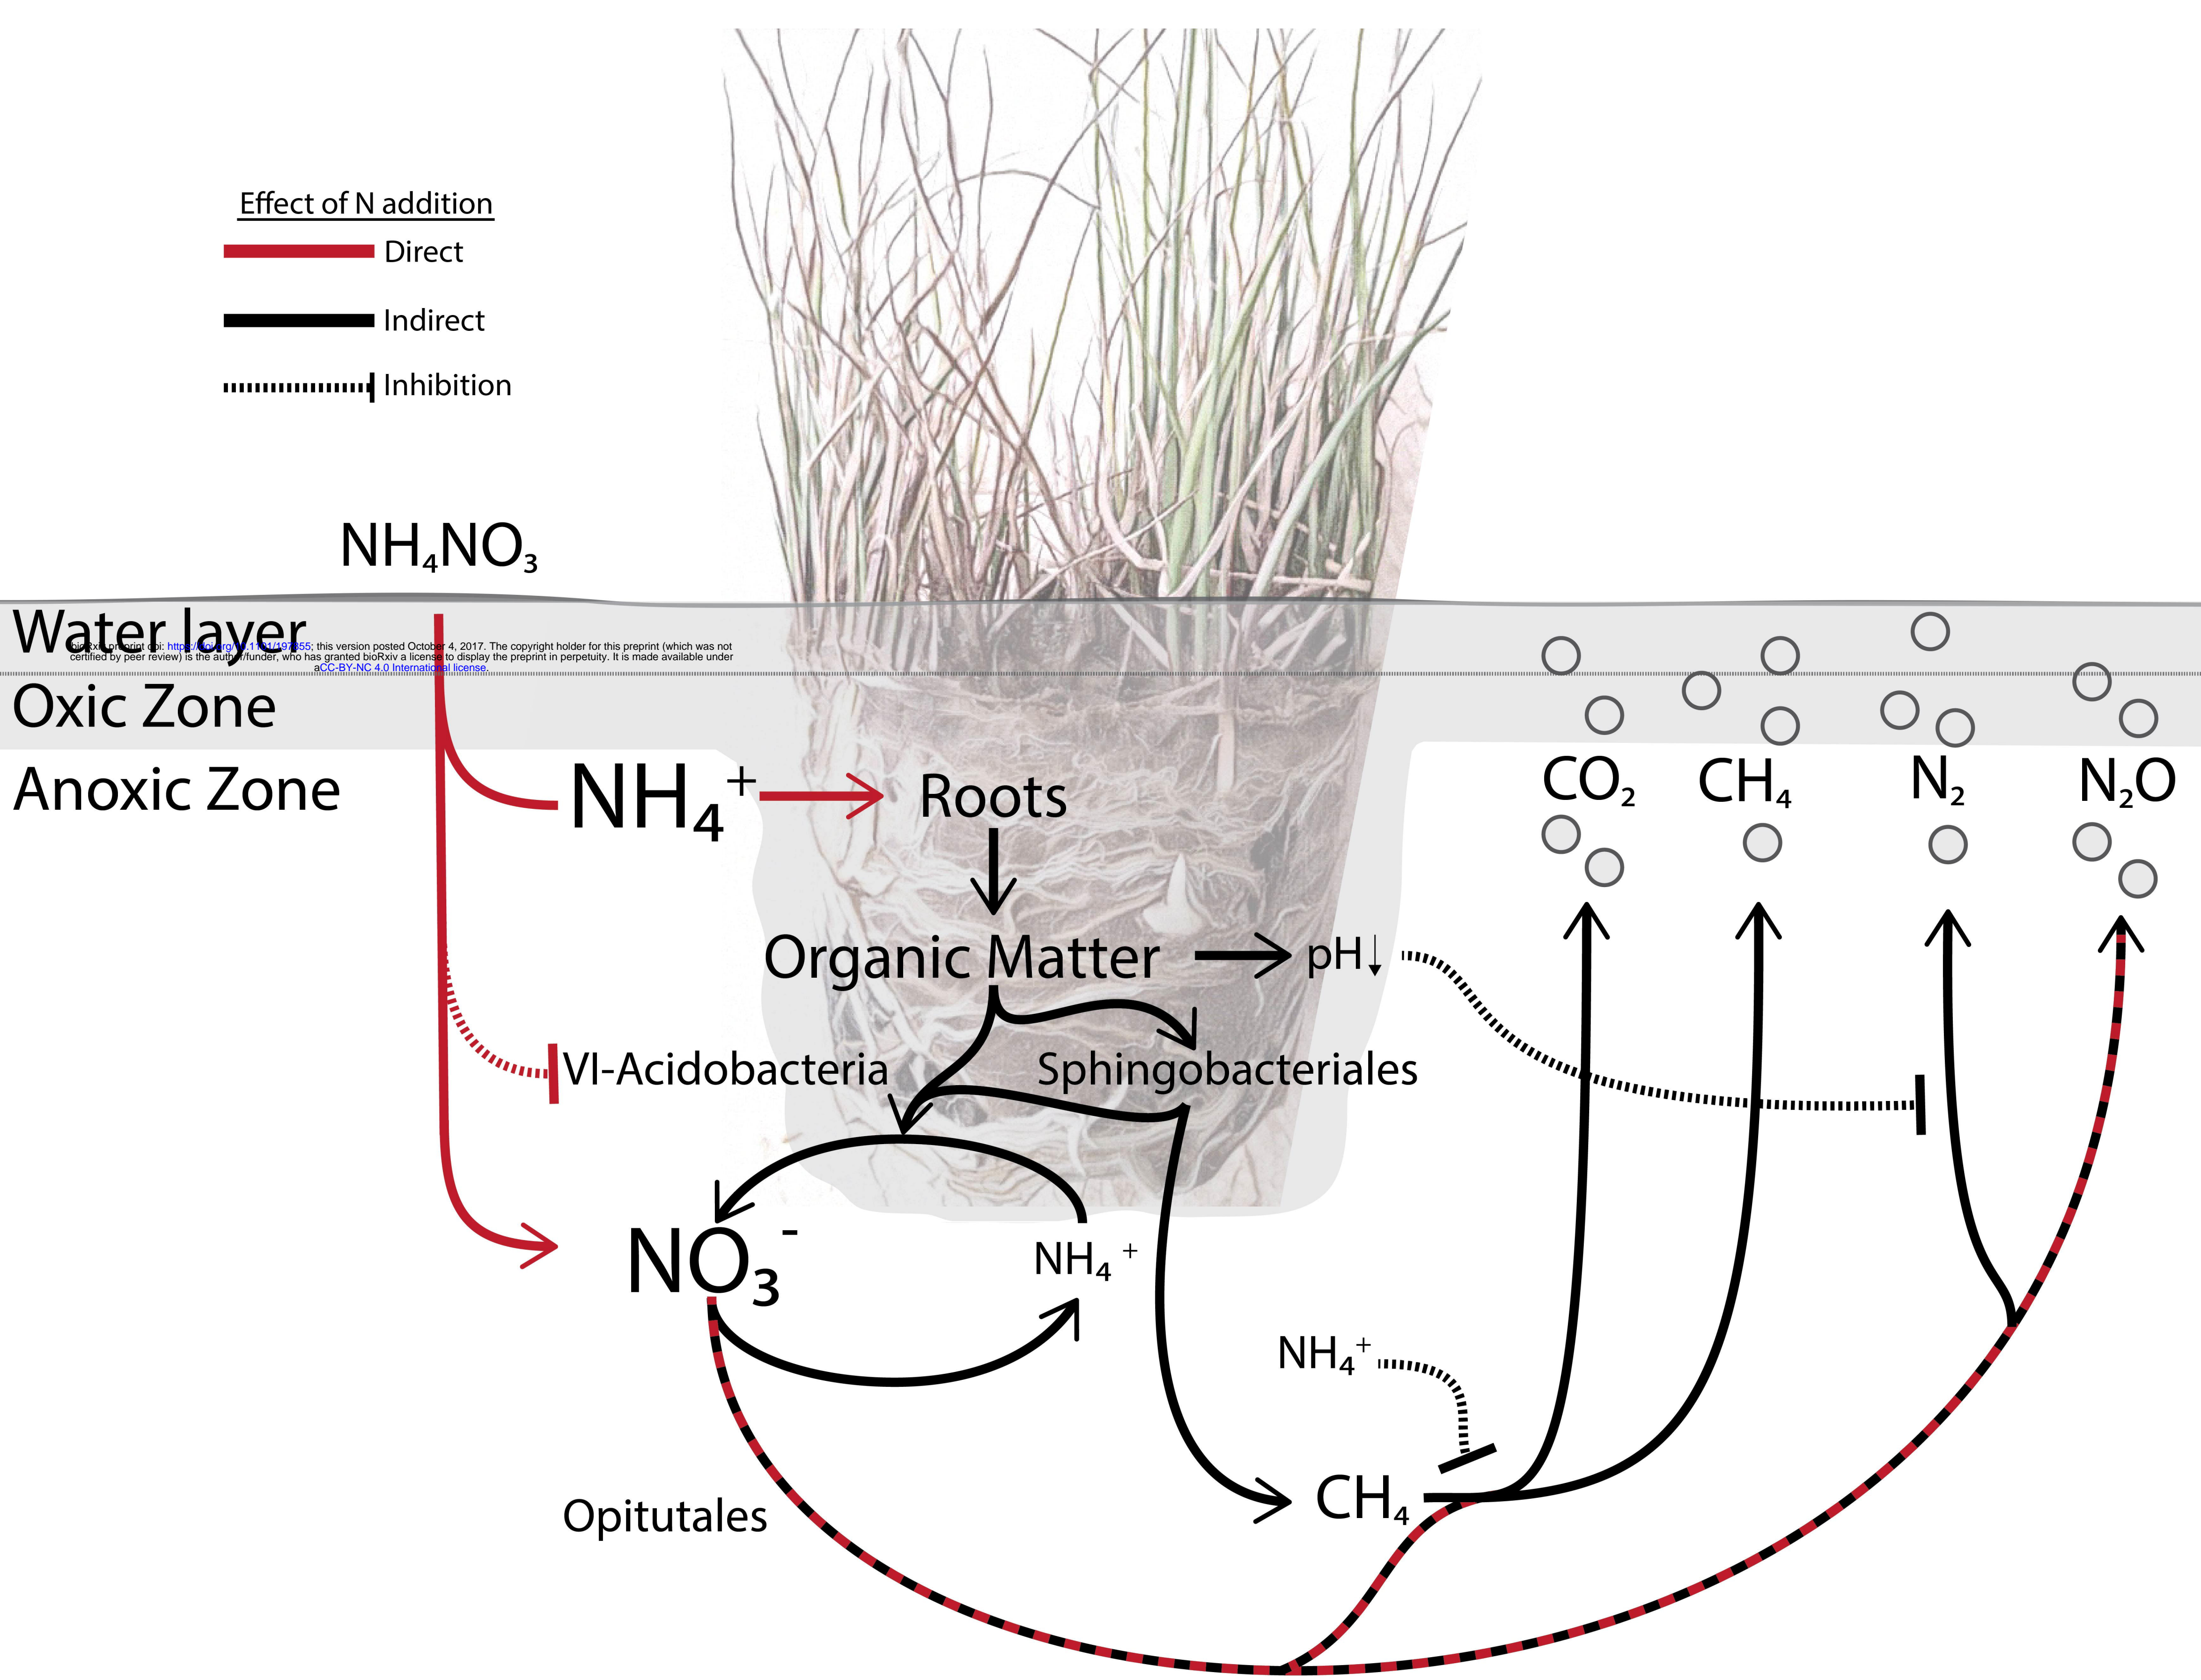

Source: https://www.biorxiv.org/content/10.1101/197855v1.full.pdf
